# Supplementary material
Source: Research Square preprint supplement (doi:10.21203/rs.3.rs-7942114/v2)
Supplement: Supplementary file 1 [file b700fd1417c48d42fdd8a83a.docx]

| **Study** | **Year** | **Country** | **Study design** | **Single/Multi centre** | **Sample size** | **Mean age (range)** | **Median age** | **Gender**  **M/F** | **Population** | **Tumour type**  **/Condition** | **Steroid dose** | **Dosing**  **duration** | **Comparator** | **Outcomes**  **Measured** | **Event** | **Key findings** |
| --- | --- | --- | --- | --- | --- | --- | --- | --- | --- | --- | --- | --- | --- | --- | --- | --- |
| **Bowden et al. (Brain metastases)** | 2023 | USA | Retrospective cohort study | Single  centre | 96 | ≈63 y | NR | 51/45 | Adults with brain metastases and focal neurological deficits undergoing surgery | Brain metastases | Pre-op mean cumulative dose 42.7 mg (range 4–170 mg)  Route NR | ≈ 2.7 days before surgery | Steroid responders vs non-responders | Neurological improvement pre-op and at follow-up | NR | Most responders showed rapid neurologic improvement with low cumulative dexamethasone doses; no advantage seen with higher doses or longer duration |
| **Vecht et al. (KPS study)** | 1994 | Nether-  lands | RCT  (double blinded) | Single  centre | 96 randomised (89 evaluable) | NR | NR | NR | Adults with brain metastases KPS ≤ 80 | Brain metastases | 4 mg/day, 8 mg/day, 16 mg/day oral dexamethasone | Series 1: ≈ 4 weeks (1/52 full dose, 3/52 taper);  Series 2: continued through radiotherapy (≈ 4/52), tapering started after day 28. | Dose comparison | Karnofsky Performance Score, symptom relief, adverse effects | 24 dropouts: 11 deaths;  9 neurological deteriorations | 4 mg/day as effective as 16 mg/day; higher doses caused more toxic effects; 4 mg/day should be tapered over ≈ 4 weeks after therapy |
| **Graham et al.**  **(MSCC radiotherapy)** | 2006 | Australia | Pilot RCT | Multi  centre | 20 | ≈66 y (41–81) | NR | 14/6 | Adults with MSCC receiving radiotherapy | Metastatic spinal cord compression | 96 mg vs 16 mg IV dexamethasone daily during radiotherapy (30 Gy/10 fractions) | Mostly 0–<10 hours pre-randomisation; exact total course NR | High vs low dose | Ambulation score: Barthel Index, FIM; Survival, adverse effect | Serious AEs: 9 (1 likely steroid-related);  8 deaths, 1 cholangitis sepsis | High-dose dexamethasone showed no clear benefit over low-dose for functional outcomes/survival; one serious adverse event likely related to high dose. |
| **Vecht et al. MSCC bolus study)** | 1989 | Nether-  lands | RCT | Multi  centre | 37 | |  | | --- |  | 61y  (22–87) | | --- | | NR | NR | Adults with MSCC | Metastatic spinal cord compression | 10 mg IV vs 100 mg IV bolus, then 16 mg orally daily | Outcomes within the first 24 hours post-dose | Bolus dose comparison | Pain score, ambulation, bladder function | NR | No significant difference in functional outcomes between high- and conventional-dose dexamethasone; adverse effects not reported. |

| **Study** | **Outcomes Measured** | **Effect of High Dose vs Low/Conventional** | **Toxicity / Adverse Events** |
| --- | --- | --- | --- |
| **Bowden et al. (Brain metastases)** | Neurologic improvement | No advantage of high dose over low | NR |
| **Vecht et al. (KPS study)** | Karnofsky Performance Score, symptom relief, adverse effects | |  | | --- |  | No advantage of high dose over low | | --- | | 11 deaths; 9 neurological deteriorations Mortality was higher in the high-dose group; causality with dexamethasone was not reported. |
| **Graham et al.**  **(MSCC radiotherapy)** | Functional outcome, survival, adverse effect | No significant difference | 9 SAEs (1likely steroid & high dose-related);  8 deaths, 1 cholangitis sepsis |
| **Vecht et al. (MSCC bolus study)** | Functional outcome | No significant difference | NR |
